# Supplementary material
Source: PubMed Central journal article supplement (PMC3287224)
Supplement: JCI59701sd.pdf [file JCI59701sd.pdf]

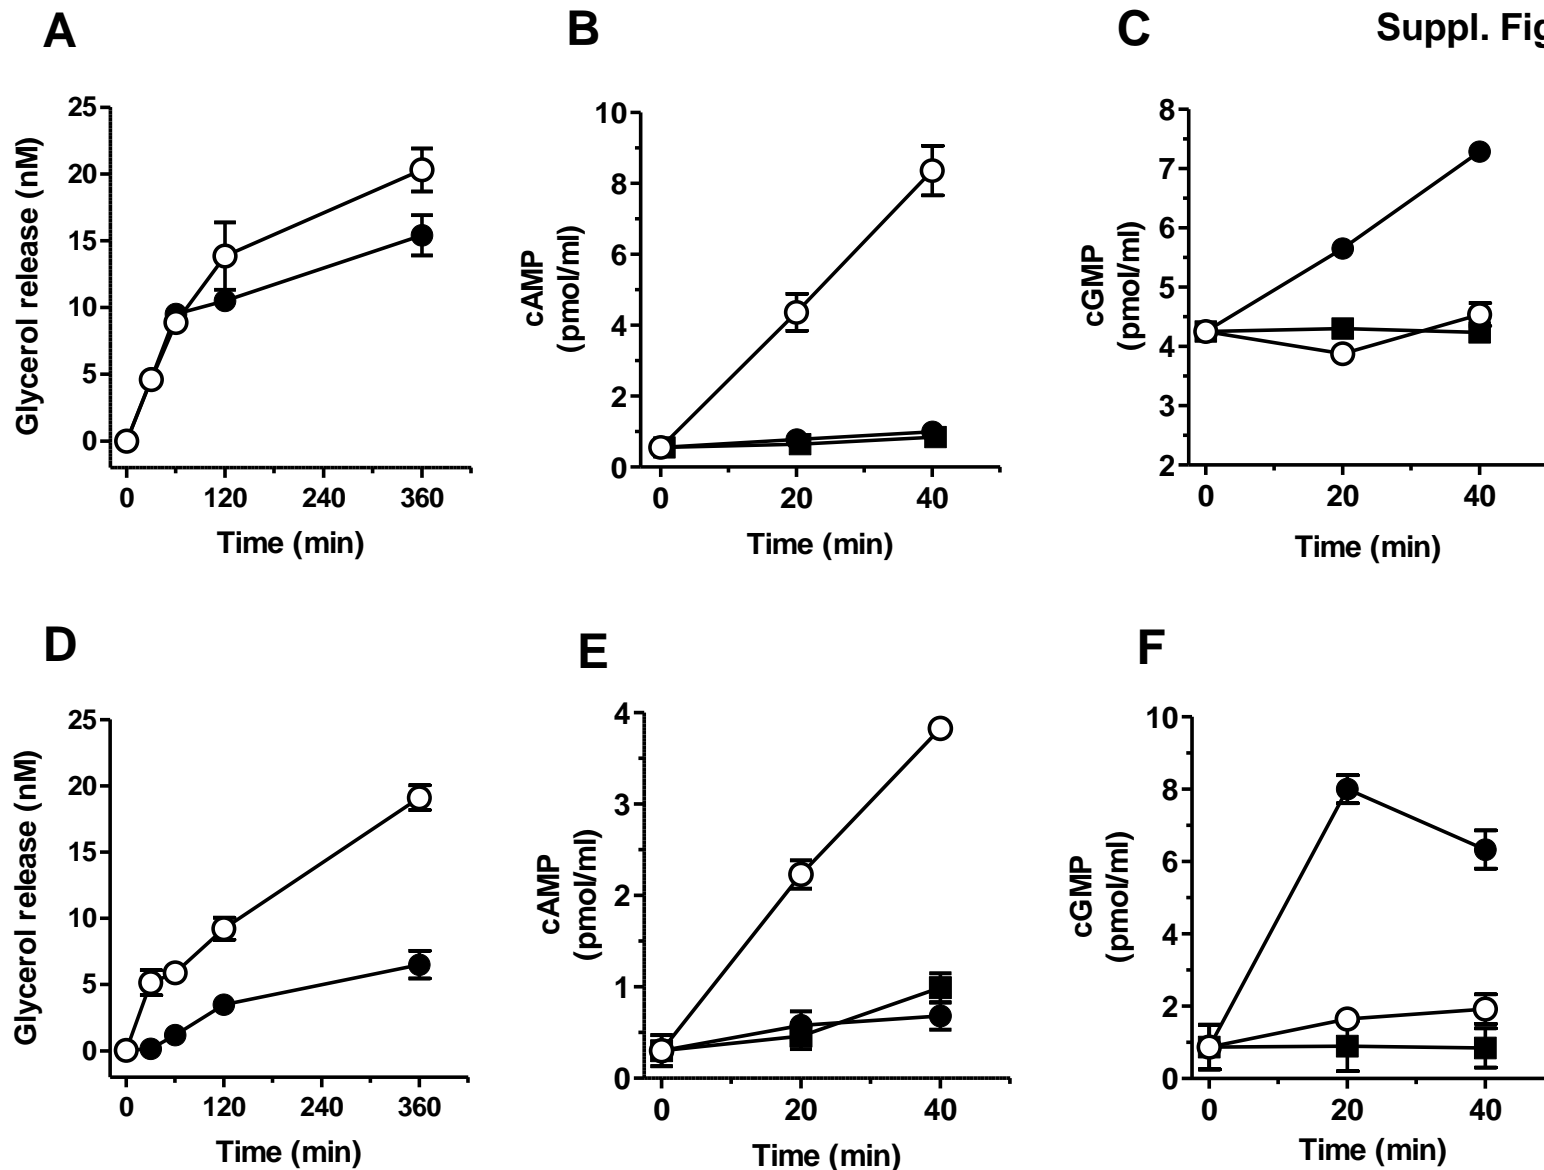

**Figure S1. ANP and  $\beta$ -agonist increase lipolysis in human adipocytes.** Lipolysis and second messenger levels in culture human subcutaneous adipocytes (A, B, C) and hMADS adipocytes (D, E, F). Cells were treated with Iso ( $\circ$ ), or ANP ( $\bullet$ ) and compared with untreated control cells ( $\blacksquare$ ). Glycerol, cAMP and cGMP concentrations were all determined as described in Methods.

*Nprc*<sup>+/+</sup>

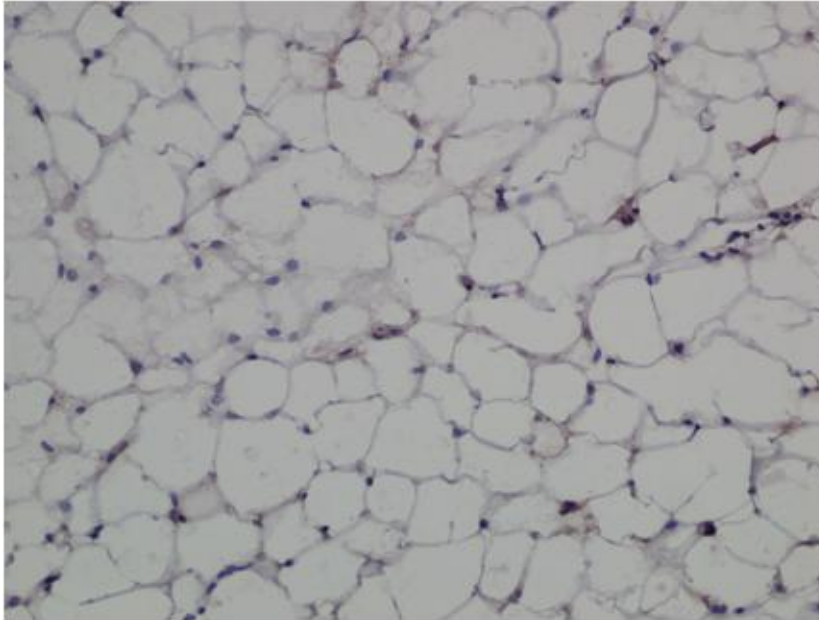

*Nprc*<sup>-/-</sup>

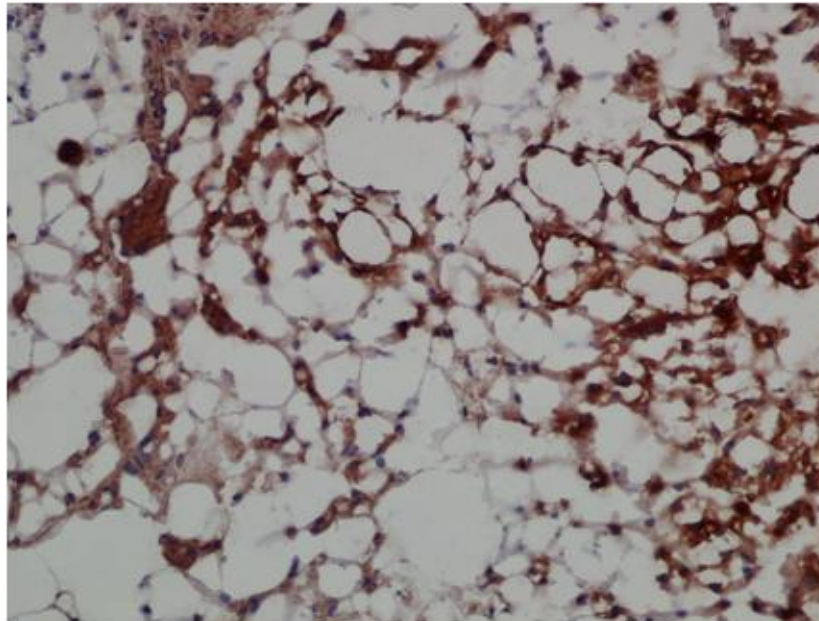

**Figure S2. UCP1 immunohistochemical analysis of epididymal WAT.** *Nprc*<sup>+/+</sup> and *Nprc*<sup>-/-</sup> epididymal WAT were processed to detect UCP1 immunoreactivity.

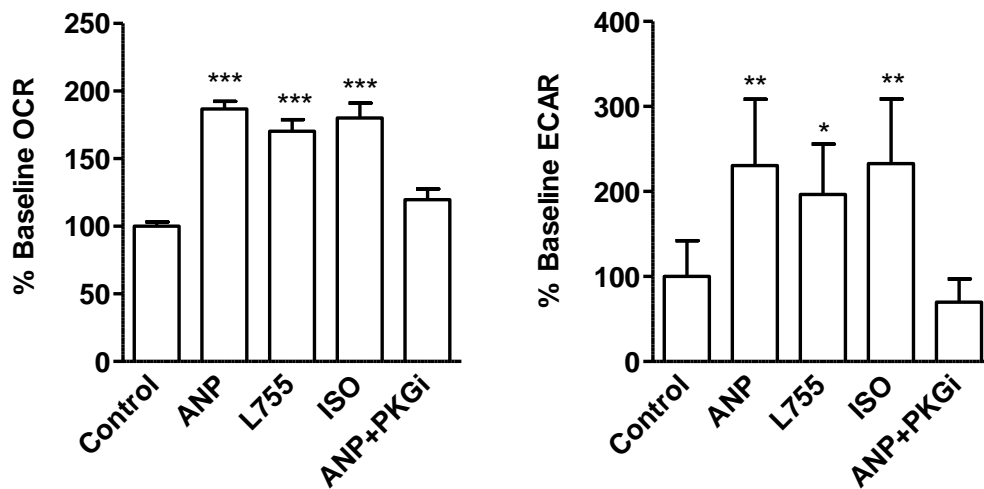

**Figure S3. Histograms summarizing the average maximal percent increase of OCR or extracellular acidification rates (ECAR) over their baseline rates.** Results are from 6-8 independent experiments. \* $P < 0.05$ , \*\* $P < 0.01$ , \*\*\* $P < 0.001$  for treated vs. untreated cells.

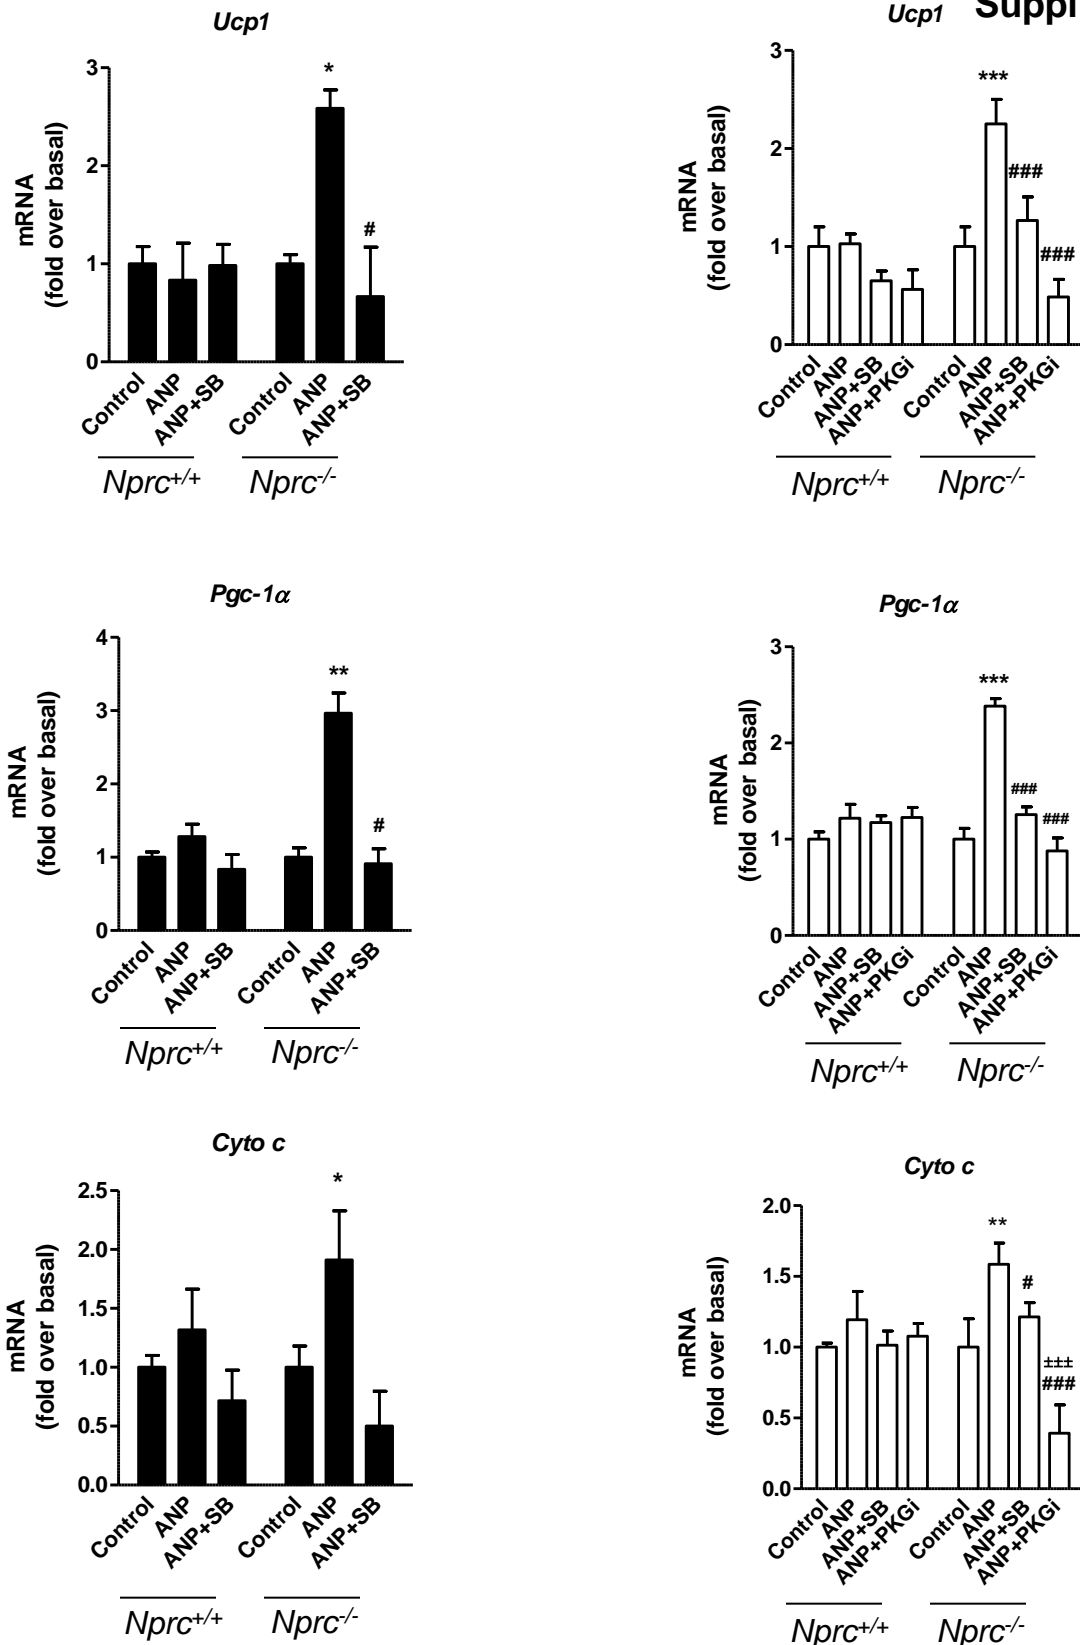

**Figure S4.** *Ucp1*, *Pgc-1α*, and *Cyto c* gene expression levels were evaluated in adipocytes obtained from iBAT (black bars) and epididymal WAT (white bars) of *Nprc*<sup>+/+</sup> vs *Nprc*<sup>-/-</sup> mice after treatment or not with ANP and pretreatment or not with PKGi or SB. mRNA levels were measured by quantitative real-time PCR, normalized to 36B4 and expressed relative to untreated control cells as described in Methods. Results are the means ± SD of at least 3 independent experiments.

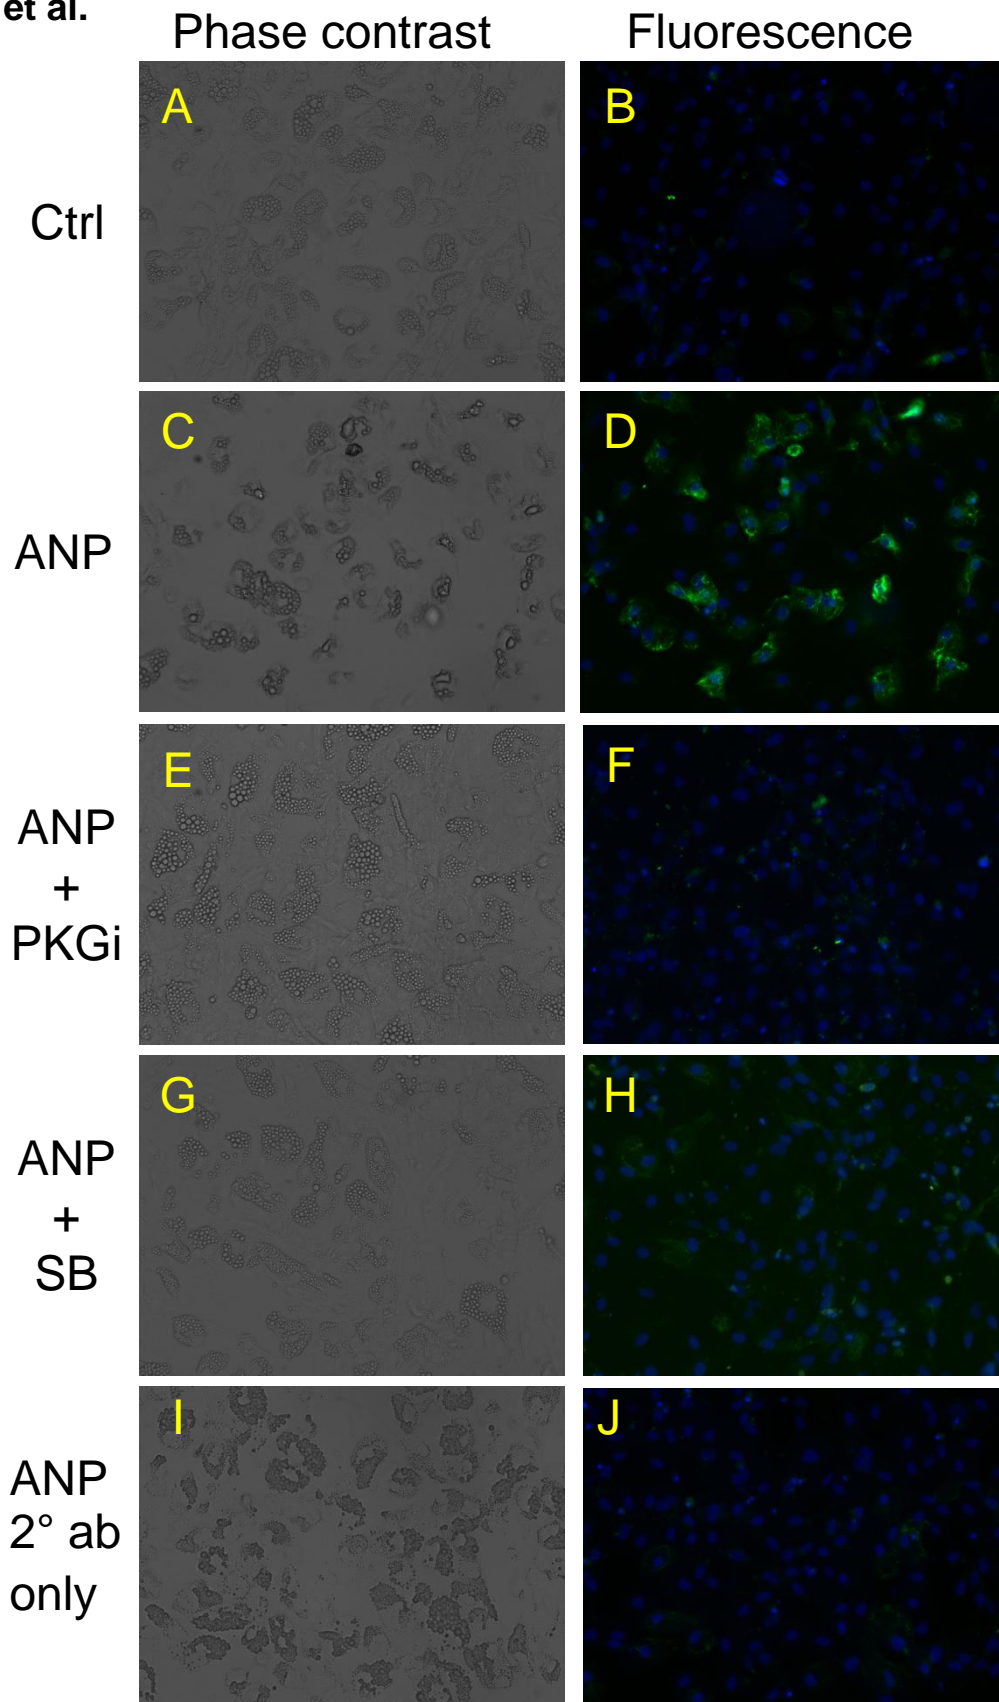

**Figure S5. Images of hMADS immunostained for UCP1 and visualized under phase-contrast or fluorescence microscopy.** Cells were differentiated on the slide and either untreated (**A, B**), or treated with ANP (**C, D**) alone or after a 30 min pre-treatment period with PKGi (**E, F**), or SB (**G, H**). Specificity of UCP1 immunostaining was verified by absence of fluorescence with secondary antibody alone (**I, J**). In all slides nuclei are shown by the blue DAPI staining.

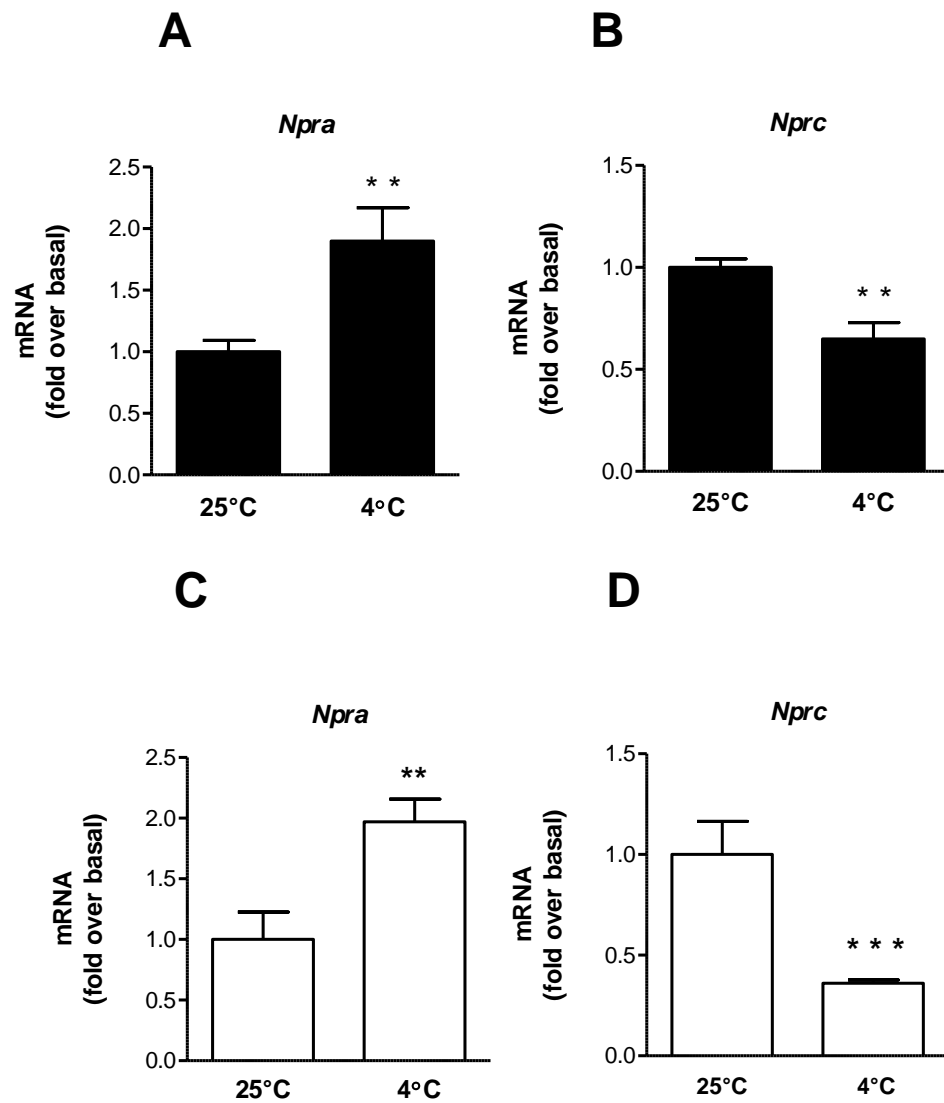

**Figure S6. Gene expression analysis of natriuretic peptide receptors in C57BL6 after 6 hrs of cold exposure (4°C; n=9) compared to control mice maintained at room temperature (25°C; n=8). **A** and **B**) *Npra* and *Nprc* mRNA levels in BAT, respectively; **C** and **D**) *Npra* and *Nprc* mRNA levels in epididymal WAT, respectively.**

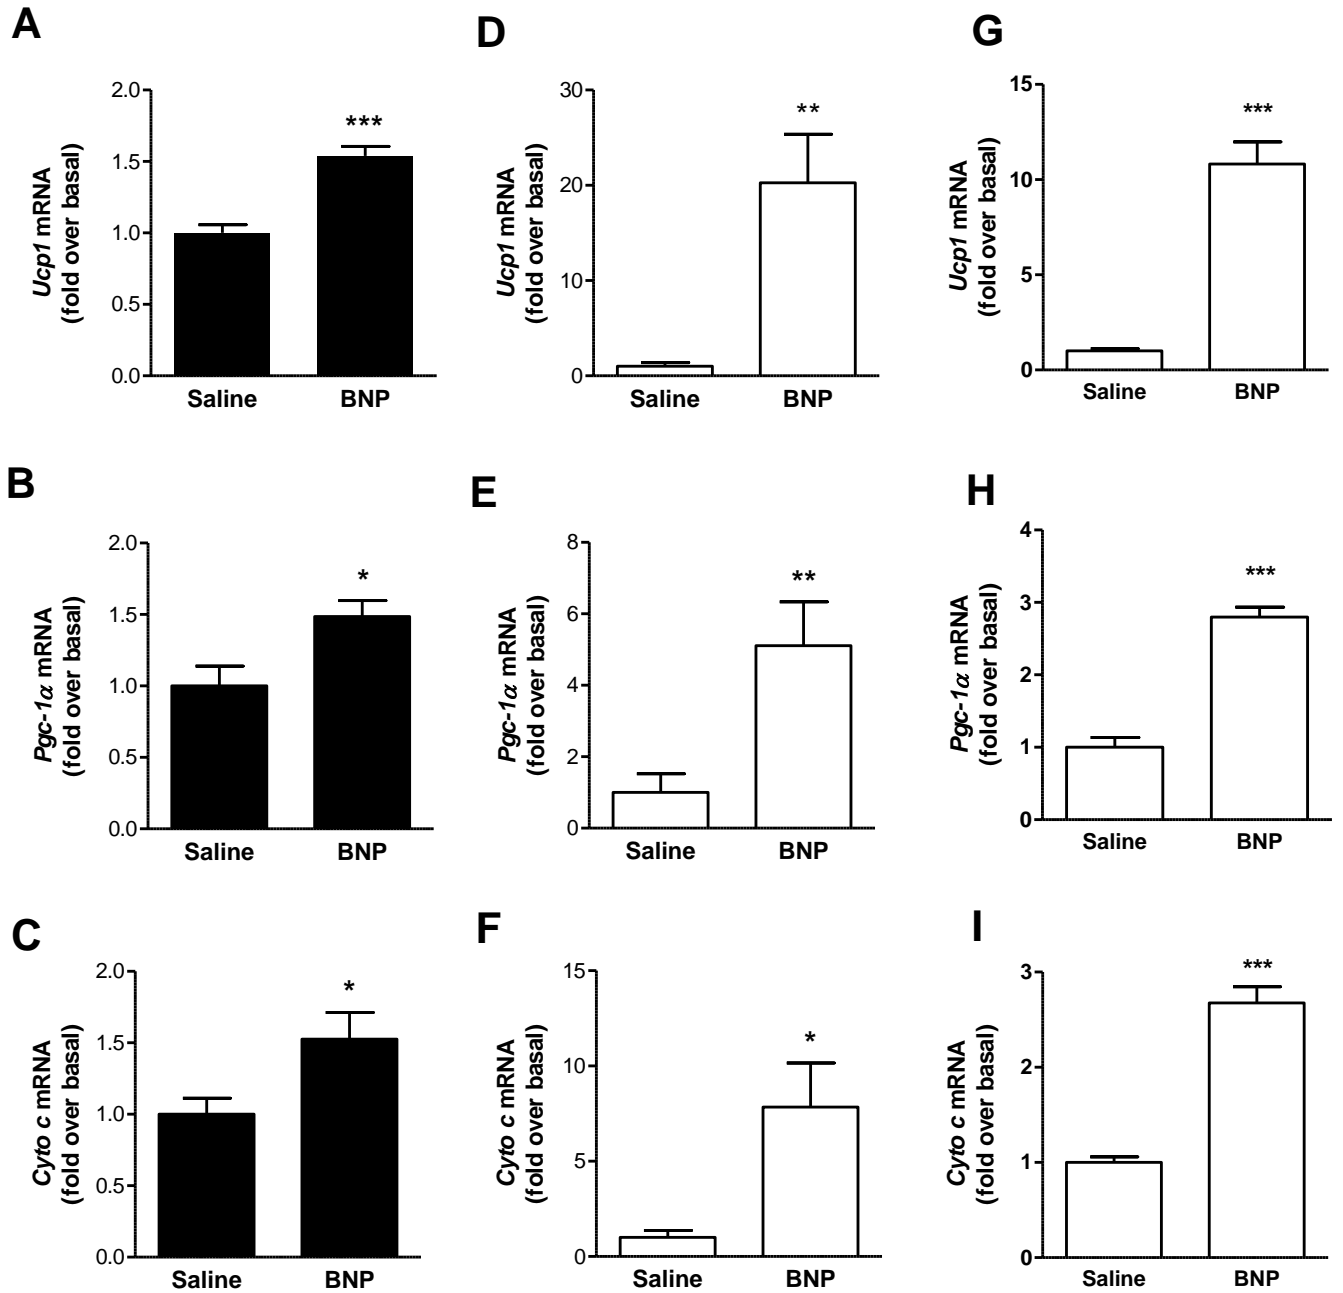

**Figure S7. Adipose tissues from C57BL/6 mice treated with BNP (2ng/kg/hr) express higher levels of brown adipocyte marker genes.** Gene expression analysis of *Ucp1*, *Pgc-1α* and *Cyto c* in iBAT (panel **A** to **C**, respectively), inguinal WAT (panel **D** to **F**, respectively) and epididymal WAT (panel **G** to **I**, respectively) from C57BL/6 mice treated with saline or BNP by Mini-pump. \* P < 0.05 vs. Saline \*\* P < 0.01 vs. Saline.

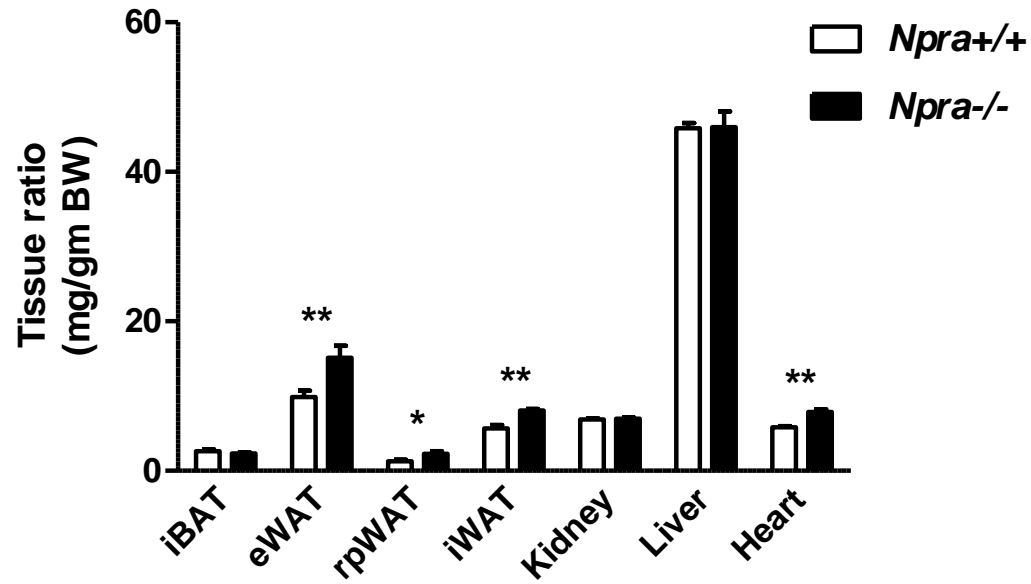

Figure S8. Ratio between weight of isolated tissues and total body weight of *Npra*<sup>+/+</sup> vs *Npra*<sup>-/-</sup> mice.



TABLE S1

Effect of ANP on glycerol release from cultured wild-type and *Nprc*<sup>-/-</sup> adipocytes

| <i>Treatment</i> | <b><i>Brown adipocytes</i></b> |     |                            |       | <b><i>White adipocytes</i></b> |     |                            |       |
|------------------|--------------------------------|-----|----------------------------|-------|--------------------------------|-----|----------------------------|-------|
|                  | <i>Nprc</i> <sup>+/+</sup>     |     | <i>Nprc</i> <sup>-/-</sup> |       | <i>Nprc</i> <sup>+/+</sup>     |     | <i>Nprc</i> <sup>-/-</sup> |       |
|                  | x                              | sd  | x                          | sd    | x                              | sd  | x                          | sd    |
| Ctrl             | 61.30 ± 9.45                   | (3) | 64.00 ± 4.86               | (3)   | 65.66 ± 11.71                  | (3) | 53.64 ± 4.39               | (3)   |
| ANP              | 71.20 ± 4.12                   | (3) | 90.04 ± 7.75               | (3)** | 68.16 ± 7.47                   | (3) | 72.95 ± 0.84               | (3)** |

Cultured brown and white adipocytes from *Nprc*<sup>+/+</sup> and *Nprc*<sup>-/-</sup> were treated with ANP (100 nM), and aliquots of culture medium were collected and assayed for glycerol release. Concentrations were determined from a standard curve. \*\*P < 0.01 vs. untreated cells.

**Table S2****Human primers**

|                                        |                         |                                                                   |
|----------------------------------------|-------------------------|-------------------------------------------------------------------|
| <b><i>UCP1</i></b>                     | FWD primer<br>RV primer | 5'- ACGACACGGTCCAGGAGTTC -3'<br>5'- CTGAGCCCGCAGTGTGG -3'         |
| <b><i>CYTO C</i></b>                   | FWD primer<br>RV primer | 5'- TGGCCCCTCCCATCTACAC -3'<br>5'- ATCCTTGGCTATCTGGGACATG -3'     |
| <b><i>PGC-1<math>\alpha</math></i></b> | FWD primer<br>RV primer | 5'- CACCAAACCCACAGAGAACA -3'<br>5'- GGGTCATTTGGTGACTCTGG -3'      |
| <b><i>PRDM16</i></b>                   | FWD primer<br>RV primer | 5'- CAGCACGGTGAAGCCATTC -3'<br>5'- GCGTGCATCCGCTTGTG -3'          |
| <b><i>hCPT1B</i></b>                   | FWD primer<br>RV primer | 5'- CTGGAAGAAACGCCTGATCC -3'<br>5'- GCATCTCTGGATGCAACTGA -3'      |
| <b><i>hMFN1</i></b>                    | FWD primer<br>RV primer | 5'- CTGTTGCCGGGTGATAGTTG -3'<br>5'- AGGAGTCAGGGCCAGAGC -3'        |
| <b><i>hMFN2</i></b>                    | FWD primer<br>RV primer | 5'- TCCCTGCTAGGAGTTGCTGTAC -3'<br>5'- CACCTCAGCCCATGTGTCTCTT -3'  |
| <b><i>hCOX10</i></b>                   | FWD primer<br>RV primer | 5'- CACACTCTCTCCTCACGCCTC -3'<br>5'- TTCTTTCAAGATACCAGACAGAGC -3' |
| <b><i>SIRT3</i></b>                    | FWD primer<br>RV primer | 5'- CTGTGTCAGCGGAAACT -3'<br>5'- TCCTATGTTACCATTTATTGTGTGC -3'    |
| <b><i>GAPDH</i></b>                    | FWD primer<br>RV primer | 5'- TGGTCTCCTCTGACTTCAAC -3'<br>5'- GTGAGGGTCTCTCTCCTCCT -3'      |

**Mouse primers**

|                                        |                         |                                                                |
|----------------------------------------|-------------------------|----------------------------------------------------------------|
| <b><i>Ucp1</i></b>                     | FWD primer<br>RV primer | 5'- TAAGCCGGCTGAGATCTTGT -3'<br>5'- GGCCTCTACGACTCAGTCCA -3'   |
| <b><i>Pgc-1<math>\alpha</math></i></b> | FWD primer<br>RV primer | 5'- CGGAAATCATATCCAACCAG -3'<br>5'- TGAGAACCGCTAGCAAGTTTG -3'  |
| <b><i>Cyto c</i></b>                   | FWD primer<br>RV primer | 5'- TGGCCCCTCCCATCTACAC -3'<br>5'- ATCCTTGGCTATCTGGGACATG -3'  |
| <b><i>Npra</i></b>                     | FWD primer<br>RV primer | 5'- CGAAGACAAGTGCATCCTGAG -3'<br>5'- TGGAGACACAGTCAACACAGC -3' |
| <b><i>Nprc</i></b>                     | FWD primer<br>RV primer | 5'- AGCTGGCTACAGCAAGAAGG -3'<br>5'- CGGCGATACCTTCAAATGTC -3'   |
| <b><i>36B4</i></b>                     | FWD primer<br>RV primer | 5'- GATGCCCAGGGAAGACAG -3'<br>5'- ACAATGAAGCATTTTGGATAATCA -3' |

**Primers for quantification of mtDNA**

|                                                     |                         |                                                                  |
|-----------------------------------------------------|-------------------------|------------------------------------------------------------------|
| <b>NADH dehydrogenase Subunit 1 (mitochondrial)</b> | FWD primer<br>RV primer | 5'- CCCTAAAACCCGCCACATCT -3'<br>5'- GAGCGATGGTGAGAGCTAAGGT -3'   |
| <b>Lipoprotein Lipase (genomic)</b>                 | FWD primer<br>RV primer | 5'- CGAGTCGTCTTTCTCCTGATGAT -3'<br>5'- TTCTGGATTCCAATGCTTCGA -3' |

**Primers for ChIP assay**

|                      |                         |                                                              |
|----------------------|-------------------------|--------------------------------------------------------------|
| <b>UCP1 enhancer</b> | FWD primer<br>RV primer | 5'- GTGCAGCGATTTCTGATTGA -3'<br>5'- AGGGTCACAGGAGAAGCTGA -3' |
| <b>UCP1 exon 2</b>   | FWD primer<br>RV primer | 5'- ACGACACGGTCCAGGAGTTC -3'<br>5'- GTTTGGGGAAGGGAGAGTTC -3' |

**Suppl Table 1.** Primer sequences used for gene expression analysis, chromatin immune-precipitation (ChIP) assay and quantification of mitochondria DNA content (mtDNA).
